# Supplementary material for: Morin encapsulated chitosan nanoparticles (MCNPs) ameliorate arsenic induced liver damage through improvement of the antioxidant system and prevention of apoptosis and inflammation in mice
Source: Royal Society of Chemistry journal article supplement (doi:10.1039/d2na00167e), 2022-01-01
Supplement: d2na00167e2.pdf [file d2na00167e2.pdf]

S1:

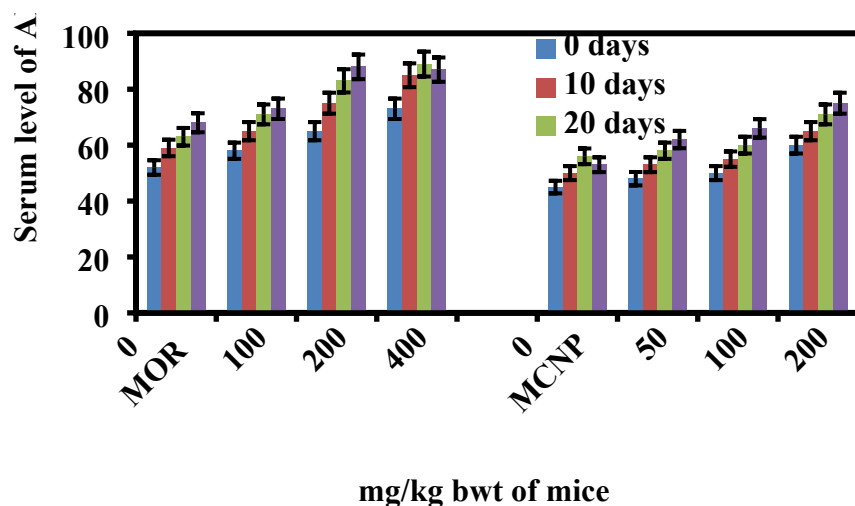

S2:

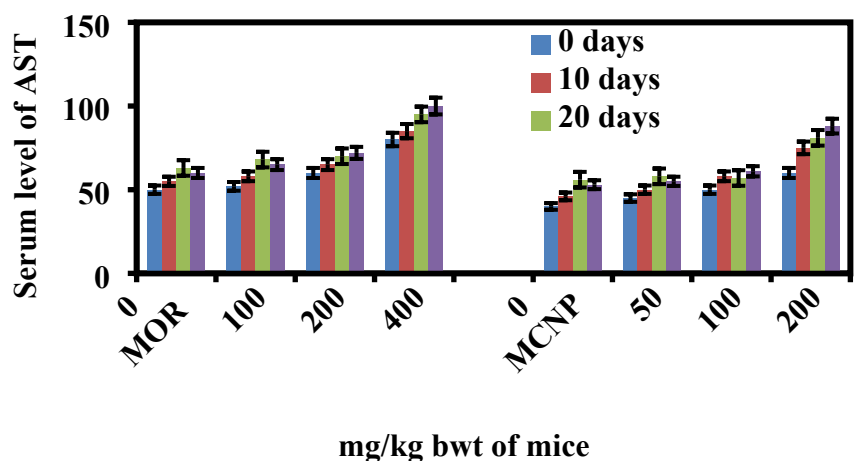

Fig S1 and S2: Effect of Morin (MOR) and MCNPs on liver function markers (ALT and AST). Different dosage of Morin (MOR) and MCNPs were orally given to the normal BALB/c mice and the serum level of ALT and AST were measured. Data is one of the three representative experiments  $\pm$  SD.
